# Supplementary material for: Restrictive spirometry versus restrictive lung function using the GLI reference values
Source: PubMed Central journal article supplement — Clin Physiol Funct Imaging. 2022 Feb 28;42(3):181–9. doi: 10.1111/cpf.12745 (PMC9311670; doi:10.1111/cpf.12745), 2022-02-28
Supplement: CPF-42-181-s001.pdf [file CPF-42-181-s001.pdf]

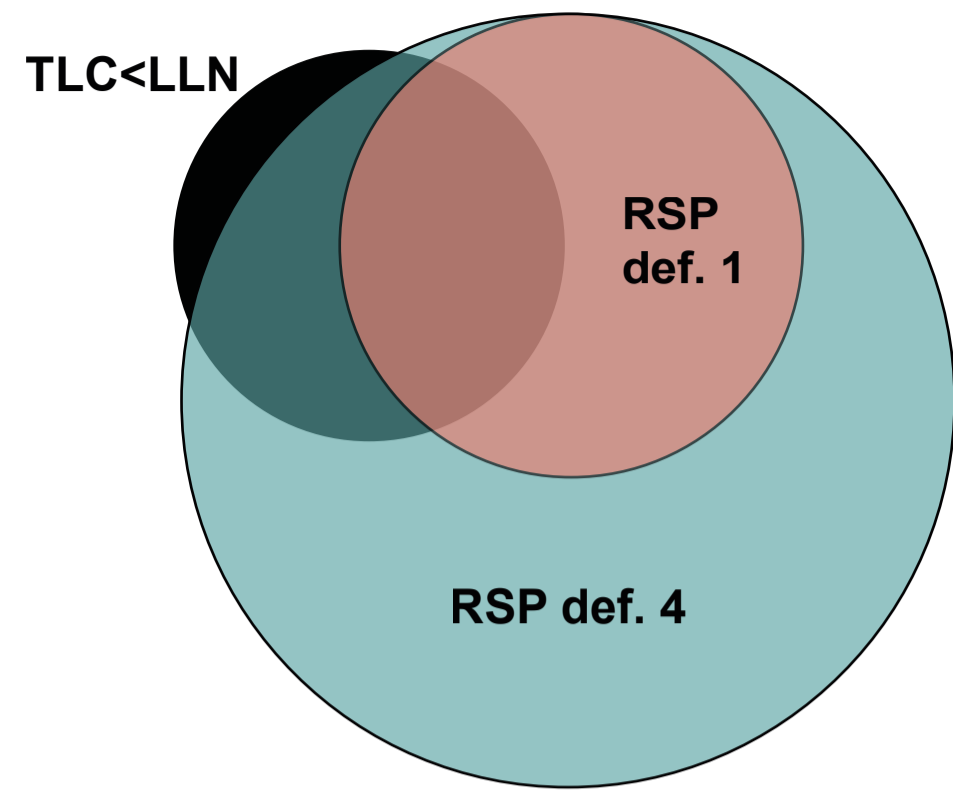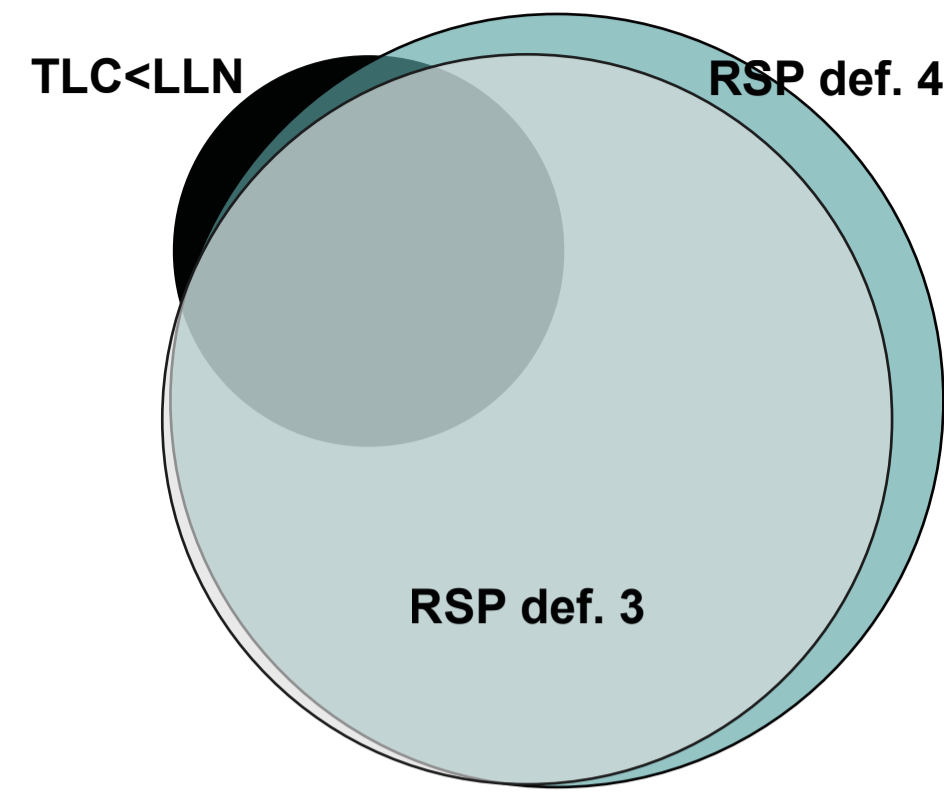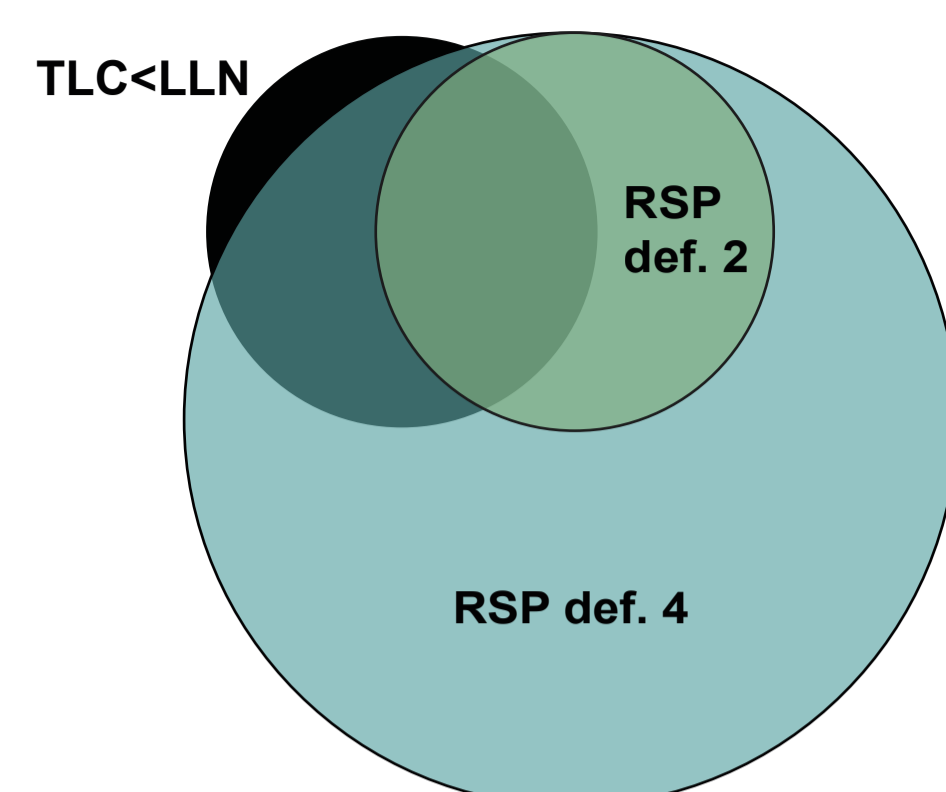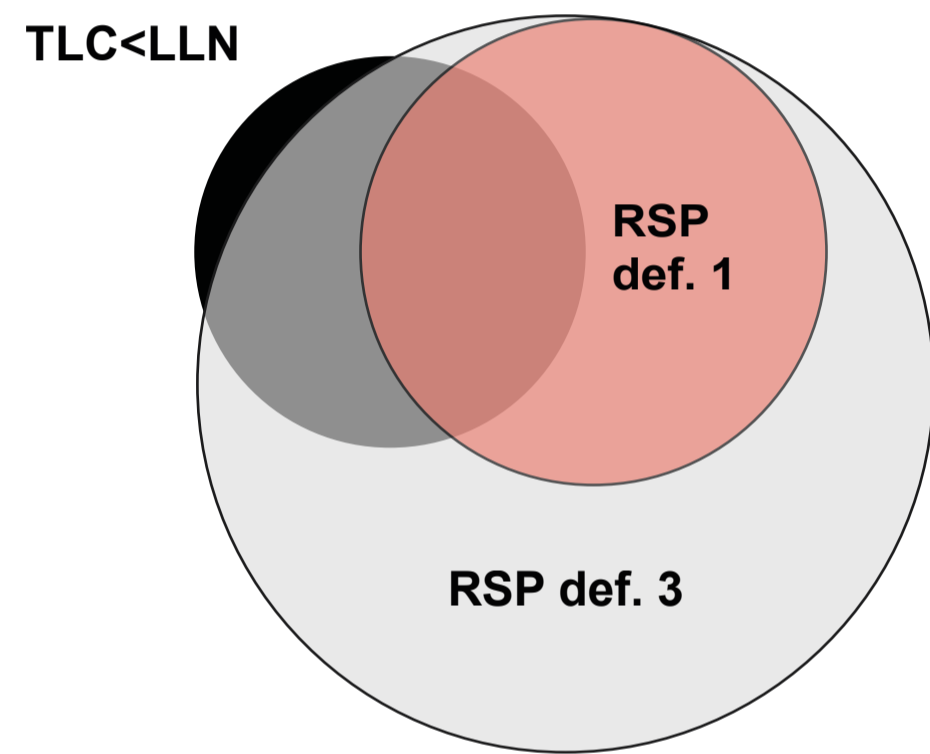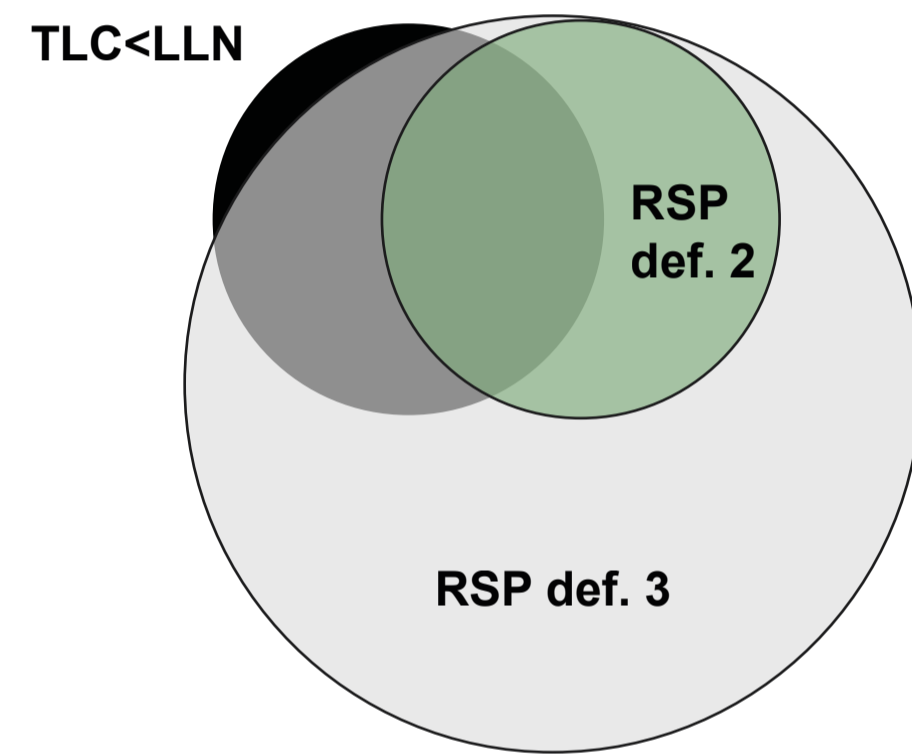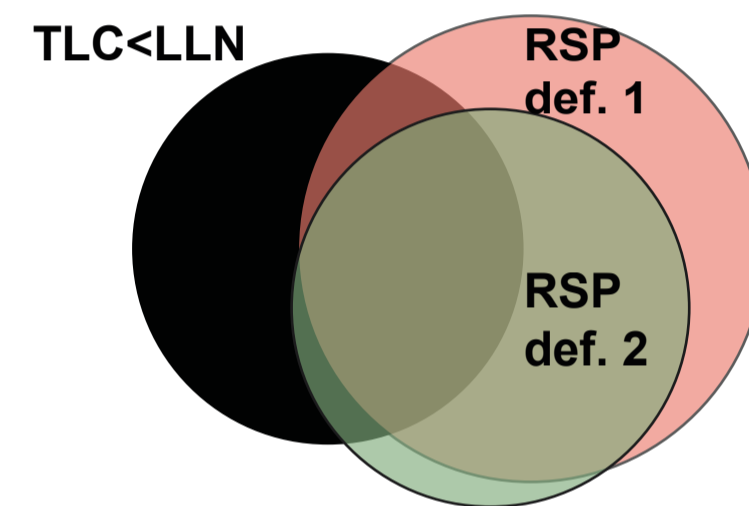

● TLC < LLN

● RSP definition 1: FVC < 80% & FEV<sub>1</sub>/FVC ≥ 0.7

● RSP definition 2: FVC < LLN & FEV<sub>1</sub>/FVC ≥ LLN

● RSP definition 3: FVC < 85.5% & FEV<sub>1</sub>/FVC ≥ LLN

● RSP definition 4: FVC Z score < -1 & FEV<sub>1</sub>/FVC ≥ LLN
