# Supplementary material for: Restrictive spirometry versus restrictive lung function using the GLI reference values
Source: PubMed Central journal article supplement — Clin Physiol Funct Imaging. 2022 Feb 28;42(3):181–9. doi: 10.1111/cpf.12745 (PMC9311670; doi:10.1111/cpf.12745), 2022-02-28
Supplement: CPF-42-181-s002.pdf [file CPF-42-181-s002.pdf]

Supplementary file 2. Presentation of data using vital capacity.

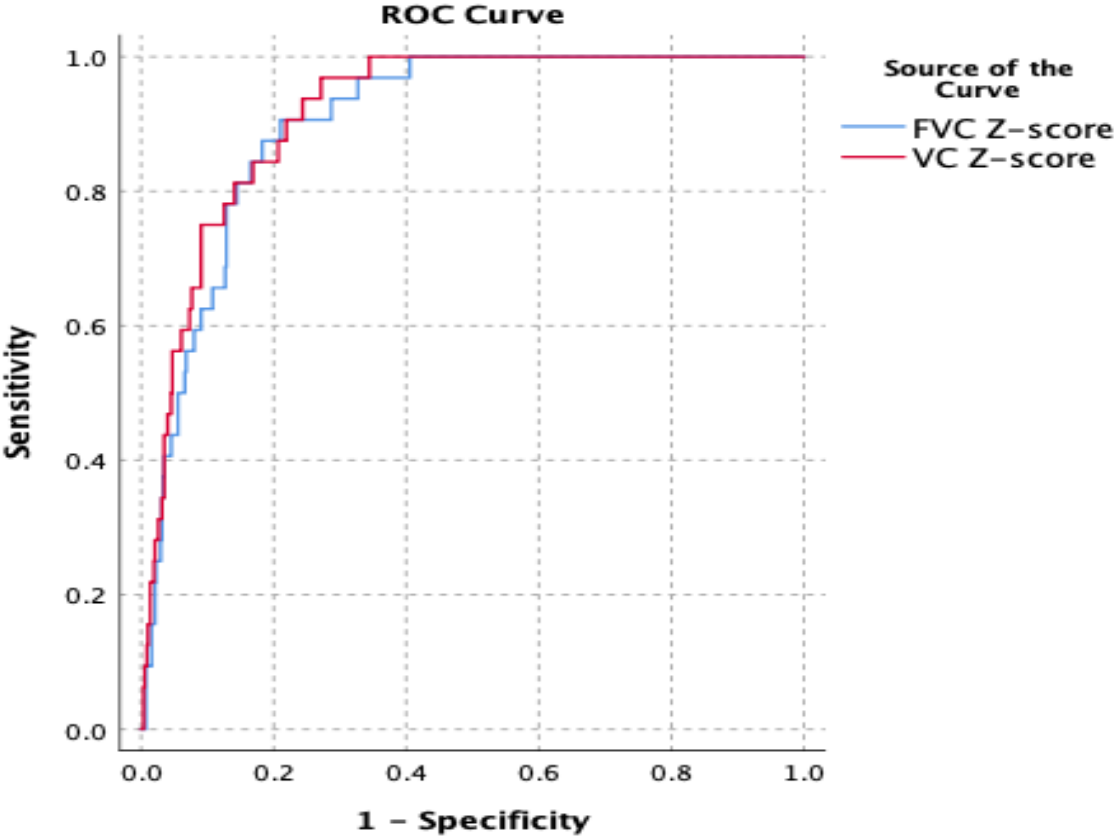

Figure 1. Comparison of receiver Operating Characteristic (ROC) curves for the ability of FVC Z-score (AUROC 0.904, 95%CI 0.867-0.941) and VC Z-score (AUROC 0.917, 95%CI 0.884-0.951) to identify restrictive lung function (TLC<lower limit of normal).

**Table 1.** Lung function measures based on vital capacity in individuals with and without restrictive lung function defined by TLC <LLN.

| <i>Parameter</i>             | <i>Restrictive lung<br/>function, n=32</i> | <i>No restrictive lung<br/>function, n=575</i> | <i>p-value</i> |
|------------------------------|--------------------------------------------|------------------------------------------------|----------------|
| VC % of predicted            | 77.5±10.2                                  | 97.7±12.2                                      | <0.001         |
| VC Z-score                   | -1.7±0.7                                   | -0.2±0.9                                       | <0.001         |
| FEV <sub>1</sub> /VC Z-score | -0.1±0.9                                   | -0.5±1.0                                       | 0.014          |

Results presented as mean ± SD. Abbreviations: FEV<sub>1</sub> = forced expiratory volume in one second; VC = vital capacity; LLN = lower limit of normal; SD = standard deviation; TLC = total lung capacity. Percent of predicted and Z-scores for FEV<sub>1</sub> and FEV<sub>1</sub>/VC are based on GLI 2012 reference values and corresponding for TLC are based on GLI 2021 reference values.

**Table 2.** Accuracy for spirometry measures to discriminate restrictive lung function (TLC<LLN) using vital capacity. The optimal cut-off values, sensitivity and specificity for respective parameter are defined by Youden method (i.e., highest Youden’s index).

| <i>Parameter</i>                                         | <i>Sensitivity (%)</i> | <i>Specificity (%)</i> | <i>AUROC (95% CI)</i> | <i>p-value</i> |
|----------------------------------------------------------|------------------------|------------------------|-----------------------|----------------|
| VC Z-score (cut-off -0.654)                              | 96.9                   | 72.9                   | 0.917 (0.884-0.951)   | <0.001         |
| VC % of predicted<br>(cut-off 89.2%)                     | 93.8                   | 77.6                   | 0.915 (0.881-0.948)   | <0.001         |
| FEV <sub>1</sub> Z-score (cut-off -0.98)                 | 81.3                   | 71.8                   | 0.814 (0.755-0.872)   | <0.001         |
| FEV <sub>1</sub> percent of predicted<br>(cut-off 87.5%) | 81.3                   | 71.0                   | 0.812 (0.754-0.870)   | <0.001         |
| FEV <sub>1</sub> /VC Z-score<br>(cut-off -0.696)         | 81.3                   | 36.0                   | 0.615 (0.513-0.716)   | 0.029          |

Abbreviations: AUROC = area under the ROC curve; CI = confidence interval; FEV<sub>1</sub> = forced expiratory volume in 1 second; VC = vital capacity; LLN = lower limit of normal; Z-score = standardized residual; RSP = restrictive spirometry pattern; TLC = total lung capacity.

**Table 3.** Overall performance and accuracy of different restrictive spirometry patterns (RSP) using vital capacity in order to discriminate restrictive lung function (TLC <LLN).

| <i>RSP SVC</i>                                                      | <i>Efficiency</i> | <i>Sensitivity (%)</i> | <i>Specificity (%)</i> | <i>PPV (%)</i> | <i>NPV (%)</i> |
|---------------------------------------------------------------------|-------------------|------------------------|------------------------|----------------|----------------|
| <b>Definition 1:</b> VC <80% of pred & FEV <sub>1</sub> /VC ≥0.7    | 0.95              | 46.9                   | 97.2                   | 48.4           | 97.0           |
| <b>Definition 2:</b> VC <LLN & FEV <sub>1</sub> /VC ≥LLN            | 0.95              | 37.5                   | 98.4                   | 57.1           | 96.6           |
| <b>Definition 3:</b> VC <89.2% of pred* & FEV <sub>1</sub> /VC ≥LLN | 0.83              | 90.6                   | 82.3                   | 22.1           | 99.4           |
| <b>Definition 4:</b> VC Z-score<-0.654* & FEV <sub>1</sub> /VC ≥LLN | 0.79              | 93.8                   | 78.3                   | 19.4           | 99.6           |

The prevalence of RSP VC definitions 1-4 was 5.1% (31/607), 3.5% (21/607), 21.6% (131/607) and 25.5% (155/607), respectively. Abbreviations: \*= The best cut-off defined by Youden's method. PPV, NPV, sensitivity and specificity were calculated from crosstabulations. FEV<sub>1</sub> = forced expiratory volume in one second; VC = vital capacity; LLN = lower limit of normal; NPV = negative predictive value; PPV = positive predictive value; RSP = restrictive spirometry pattern; TLC = total lung capacity, % of pred=percent of predicted value.
